# Supplementary material for: Parental Encouragement of Healthy Lifestyles for Their Children and Personally Caring about Healthy Lifestyles Is Positively Associated with Children Using Vitamin D Supplements
Source: MDPI journal article supplement (doi:10.3390/nu8100596), 2016-09-24
Supplement: s1 [file s1]

# Supplementary Materials: Parental Encouragement of Healthy Lifestyles for Their Children and Personally Caring about Healthy Lifestyles Is Positively Associated with Children Using Vitamin D Supplements

Lalani L. Munasinghe, Yan Yuan, Erin L. Faught, Noreen D. Willows and Paul J. Veugelers

**Table S1.** Prevalence between parents' responses to their encouragement for and care about eating healthy foods \*.

|                                                                 | Parental Personal Care for Eating Healthy Foods |                 |               |
|-----------------------------------------------------------------|-------------------------------------------------|-----------------|---------------|
|                                                                 | Not at all/A little bit (%)                     | Quite a lot (%) | Very much (%) |
| <b>Parental encouragement for children to eat healthy foods</b> |                                                 |                 |               |
| Not at all/A little bit                                         | 28.66                                           | 4.32            | 3.46          |
| Quite a lot                                                     | 57.65                                           | 63.60           | 22.97         |
| Very much                                                       | 12.23                                           | 31.91           | 73.24         |

\* Results were weighted to represent provincial estimates of the grade 5 students population (age: 10–11 years old) in Alberta. Missing data is <2%. *p*-value for Pearson Chi-sq test < 0.001.

**Table S2.** Prevalence between parents' responses to their encouragement for and care about being physically active \*.

|                                                           | Parental Personal Care about Being Physically Active |                 |               |
|-----------------------------------------------------------|------------------------------------------------------|-----------------|---------------|
|                                                           | Not at all/A little bit (%)                          | Quite a lot (%) | Very much (%) |
| <b>Parental encouragement for being physically active</b> |                                                      |                 |               |
| Not at all/A little bit                                   | 27.67                                                | 10.22           | 4.55          |
| Quite a lot                                               | 48.89                                                | 50.12           | 29.17         |
| Very much                                                 | 22.56                                                | 39.11           | 66.01         |

\* Results were weighted to represent provincial estimates of the grade 5 students population (age: 10–11 years old) in Alberta. Missing data is <1%. *p*-value for Pearson Chi-sq test < 0.001.
